# Supplementary material
Source: PubMed Central journal article supplement (PMC4674352)
Supplement: NIHMS737350-supplement.pdf [file NIHMS737350-supplement.pdf]

Favor marcar      el número de veces que comió en un día cualquiera de los siguientes:

|                         | SODAS,<br>JUGOS,<br>BEBIDAS<br>AZUCARADAS | COMIDAS<br>FRITAS Y/O<br>GRASOSAS | DULCES<br>Y<br>POSTRES | TORTILLAS<br>PANES<br>Y<br>GRANO | EMBUTIDOS   |
|-------------------------|-------------------------------------------|-----------------------------------|------------------------|----------------------------------|-------------|
| Jueves <b>8/1/13</b>    | 0 1 2 3 4 5                               | 0 1 2 3 4 5                       | 0 1 2 3 4 5            | 0 1 2 3 4 5                      | 0 1 2 3 4 5 |
| Viernes <b>8/2/13</b>   | 0 1 2 3 4 5                               | 0 1 2 3 4 5                       | 0 1 2 3 4 5            | 0 1 2 3 4 5                      | 0 1 2 3 4 5 |
| Sábado <b>8/3/13</b>    | 0 1 2 3 4 5                               | 0 1 2 3 4 5                       | 0 1 2 3 4 5            | 0 1 2 3 4 5                      | 0 1 2 3 4 5 |
| Domingo <b>8/4/13</b>   | 0 1 2 3 4 5                               | 0 1 2 3 4 5                       | 0 1 2 3 4 5            | 0 1 2 3 4 5                      | 0 1 2 3 4 5 |
| Lunes <b>8/5/13</b>     | 0 1 2 3 4 5                               | 0 1 2 3 4 5                       | 0 1 2 3 4 5            | 0 1 2 3 4 5                      | 0 1 2 3 4 5 |
| Martes <b>8/6/13</b>    | 0 1 2 3 4 5                               | 0 1 2 3 4 5                       | 0 1 2 3 4 5            | 0 1 2 3 4 5                      | 0 1 2 3 4 5 |
| Miércoles <b>8/7/13</b> | 0 1 2 3 4 5                               | 0 1 2 3 4 5                       | 0 1 2 3 4 5            | 0 1 2 3 4 5                      | 0 1 2 3 4 5 |

- Sodas, jugos y otras bebidas azucaradas:**

- Comida frita o grasosa:**

- Dulces y postres:**

- Tortillas, panes y otros granos:**

- Embutidos:**


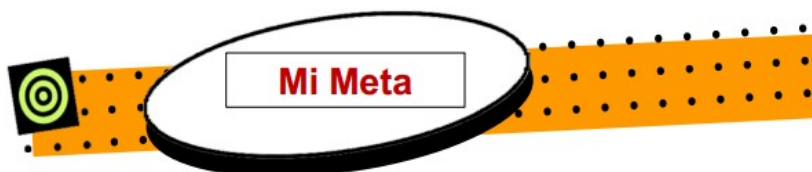

**2 o Menos de Estos Cada Día**
